# Supplementary material for: Genome analysis of Pseudoalteromonas flavipulchra JG1 reveals various survival advantages in marine environment
Source: PubMed Central journal article supplement (PMC3853003; doi:10.1186/1471-2164-14-707), 2013-10-16
Supplement: 1471-2164-14-707-S2.pdf [file 1471-2164-14-707-S2.pdf]

**Table S1 Genes within the gene clusters involved in secondary metabolites synthesis**

| Locus                                  | Proteins size | Gene name | Discription                                                             |
|----------------------------------------|---------------|-----------|-------------------------------------------------------------------------|
| <b>bacteriocin-type gene cluster 1</b> |               |           |                                                                         |
| FaGL2831                               | 487           | traK      | conjugation protein                                                     |
| FaGL2832                               | 37            | -         | hypothetical protein                                                    |
| FaGL2833                               | 232           | djlA      | DnaJ like chaperone protein                                             |
| FaGL2834                               | 292           | PHYH      | phytanoyl-CoA hydroxylase                                               |
| FaGL2835                               | 367           | -         | hypothetical protein                                                    |
| FaGL2836                               | 184           | cobO      | cob(I)alamin adenosyltransferase                                        |
| FaGL2837                               | 781           | acsF      | magnesium-protoporphyrin IX monomethyl ester (oxidative) cyclase        |
| FaGL2838                               | 41            | -         | putative transposase                                                    |
| FaGL2840                               | 67            | -         | putative transposase                                                    |
| FaGL2841                               | 441           | hisS      | histidyl-tRNA synthetase                                                |
| <b>bacteriocin-type gene cluster 2</b> |               |           |                                                                         |
| FaGL3672                               | 419           | -         | hypothetical protein                                                    |
| FaGL3673                               | 334           | -         | hypothetical protein                                                    |
| FaGL3674                               | 124           | -         | hypothetical protein                                                    |
| FaGL3675                               | 321           | dusC      | tRNA-dihydrouridine synthase C                                          |
| FaGL3676                               | 339           | -         | hypothetical protein                                                    |
| FaGL3677                               | 278           | -         | hypothetical protein                                                    |
| FaGL3678                               | 249           | -         | hypothetical protein                                                    |
| FaGL3680                               | 181           | apt       | adenine phosphoribosyltransferase                                       |
| FaGL3681                               | 775           | dnaX      | DNA polymerase III subunit gamma/tau                                    |
| FaGL3682                               | 108           | -         | hypothetical protein                                                    |
| <b>bacteriocin-type gene cluster 3</b> |               |           |                                                                         |
| FaGL4702                               | 929           | hisA      | phosphoribosylformimino-5-aminoimidazole carboxamide ribotide isomerase |
| FaGL4703                               | 302           | pleD      | two-component system, cell cycle response regulator                     |
| FaGL4704                               | 330           | oruR      | ornithine utilization regulator                                         |
| FaGL4705                               | 149           | -         | hypothetical protein                                                    |
| FaGL4706                               | 276           | -         | hypothetical protein, belongs to the UPF0276 family                     |
| FaGL4707                               | 266           | -         | hypothetical protein                                                    |
| FaGL4708                               | 37            | -         | hypothetical protein                                                    |
| FaGL4710                               | 621           | proA      | alkalin serine protease                                                 |
| FaGL4711                               | 280           | -         | AraC family transcriptional regulator                                   |

---

|                                                                                                |      |      |                                                                         |
|------------------------------------------------------------------------------------------------|------|------|-------------------------------------------------------------------------|
| FaGL4712                                                                                       | 701  | fhuA | iron complex outermembrane receptor protein                             |
| <b>bacteriocin-type gene cluster 4</b>                                                         |      |      |                                                                         |
| FaGL4805                                                                                       | 1083 | tri  | tricorn protease                                                        |
| FaGL4806                                                                                       | 293  | -    | hypothetical protein                                                    |
| FaGL4807                                                                                       | 164  | -    | hypothetical protein                                                    |
| FaGL4808                                                                                       | 775  | -    | hypothetical protein                                                    |
| FaGL4809                                                                                       | 316  | -    | hypothetical protein, belongs to the UPF0276 family                     |
| FaGL4810                                                                                       | 291  | -    | hypothetical protein                                                    |
| FaGL4811                                                                                       | 648  | -    | non-specific serine/threonine protein kinase                            |
| FaGL4812                                                                                       | 373  | -    | hypothetical protein                                                    |
| FaGL4813                                                                                       | 121  | -    | hypothetical protein                                                    |
| FaGL4814                                                                                       | 634  | dppV | Dipeptidyl-peptidase 5                                                  |
| <b>lantipeptide biosynthesis gene cluster (FaGL4338-FaGL4382)</b>                              |      |      |                                                                         |
| <b>key genes</b>                                                                               |      |      |                                                                         |
| FaGL4346                                                                                       | 239  | araC | AraC family transcriptional regulator                                   |
| FaGL4347                                                                                       | 888  | hisA | phosphoribosylformimino-5-aminoimidazole carboxamide ribotide isomerase |
| FaGL4348                                                                                       | 501  | -    | tryptophan halogenase                                                   |
| FaGL 4349                                                                                      | 421  | fucP | MFS transporter, FHS family, L-fucose permease                          |
| FaGL 4350                                                                                      | 291  | glk  | glucokinase                                                             |
| FaGL 4351                                                                                      | 842  | -    | hexosaminidase                                                          |
| FaGL 4354                                                                                      | 533  | arsO | putative flavoprotein involved in K <sup>+</sup> transport              |
| FaGL4355                                                                                       | 1042 | epiB | epidermin biosynthesis protein                                          |
| FaGL4356                                                                                       | 386  | spaC | subtilin biosynthesis protein                                           |
| FaGL4358                                                                                       | 169  | cvaB | ATP-binding cassette, subfamily B                                       |
| FaGL4362                                                                                       | 307  | panE | 2-dehydropantoate 2-reductase                                           |
| FaGL4364                                                                                       | 411  | carB | carbamoyl-phosphate synthase large subunit                              |
| FaGL4368                                                                                       | 412  | iaaL | indoleacetate---lysine synthetase                                       |
| FaGL4369                                                                                       | 477  | fadD | long-chain acyl-CoA synthetase                                          |
| FaGL4370                                                                                       | 429  | fabF | 3-oxoacyl-[acyl-carrier-protein] synthase II                            |
| FaGL4371                                                                                       | 365  | fabF | 3-oxoacyl-[acyl-carrier-protein] synthase I                             |
| FaGL4373                                                                                       | 238  | fabG | 3-oxoacyl-[acyl-carrier protein] reductase                              |
| FaGL4376                                                                                       | 264  | -    | glucose-6-phosphate 1-epimerase                                         |
| FaGL4377                                                                                       | 251  | acpT | 4'-phosphopantetheinyl transferase                                      |
| FaGL4380                                                                                       | 231  | -    | putative ABC transport system ATP-binding protein                       |
| FaGL4382                                                                                       | 255  | algR | two-component system, LytT family, response regulator                   |
| <b>type I polyketide/non-ribosomal peptide (PKS/NRPS) hybrid cluster 1 (FaGL0407-FaGL0461)</b> |      |      |                                                                         |
| <b>key genes</b>                                                                               |      |      |                                                                         |

---

---

|          |      |      |                                                                                     |
|----------|------|------|-------------------------------------------------------------------------------------|
| FaGL0407 | 217  | yesM | two-component system, LytT family, sensor kinase                                    |
| FaGL0408 | 518  | ybaR | sulfate permease, SulP family                                                       |
| FaGL0410 | 152  | ybaO | Lrp/AsnC family transcriptional regulator                                           |
| FaGL0411 | 213  | gloB | hydroxyacylglutathione hydrolase                                                    |
| FaGL0412 | 589  | -    | hypothetical protein                                                                |
| FaGL0413 | 290  | -    | short chain dehydrogenase                                                           |
| FaGL0414 | 119  | rplT | 50S ribosomal protein L20                                                           |
| FaGL0415 | 77   | rpmI | 50S ribosomal subunit protein A                                                     |
| FaGL0416 | 187  | infC | translation initiation factor IF-3                                                  |
| FaGL0417 | 636  | thrS | threonyl-tRNA synthetase                                                            |
| FaGL0421 | 614  | -    | ATP-binding cassette, subfamily B                                                   |
| FaGL0422 | 200  | rutR | TetR/AcrR family transcriptional regulator                                          |
| FaGL0423 | 374  | acrA | AcrA/E family efflux transporter MFP subunit                                        |
| FaGL0424 | 1039 | -    | hydrophobic/amphiphilic exporter-1 (mainly G <sup>-</sup> bacteria), HAE1 family    |
| FaGL0425 | 584  | -    | fatty-acyl-CoA synthase                                                             |
| FaGL0426 | 480  | katE | catalase                                                                            |
| FaGL0428 | 445  | ntrY | two-component system, NtrC family, nitrogen regulation sensor histidine kinase NtrY |
| FaGL0429 | 439  | -    | two-component system, NtrC family, response regulator                               |
| FaGL0430 | 406  | -    | putative ABC transport system permease protein                                      |
| FaGL0431 | 453  | -    | putative ABC transport system permease protein                                      |
| FaGL0432 | 231  | -    | putative ABC transport system ATP-binding protein                                   |
| FaGL0433 | 422  | -    | HlyD family secretion protein                                                       |
| FaGL0434 | 409  | lolE | lipoprotein releasing system transmembrane protein                                  |
| FaGL0435 | 229  | lolD | lipoprotein-releasing system ATP-binding protein                                    |
| FaGL0436 | 399  | lolC | lipoprotein-releasing system permease protein                                       |
| FaGL0437 | 159  | lrp  | Lrp/AsnC family transcriptional regulator, leucine-responsive regulatory protein    |
| FaGL0441 | 434  | dapE | succinyl-diaminopimelate desuccinylase                                              |
| FaGL0442 | 3113 | -    | beta-ketoacyl synthase                                                              |
| FaGL0443 | 551  | crtH | prolycopene isomerase                                                               |
| FaGL0444 | 178  | fldB | flavodoxin II                                                                       |
| FaGL0445 | 554  | crtH | prolycopene isomerase                                                               |
| FaGL0446 | 318  | -    | lathosterol oxidase                                                                 |
| FaGL0447 | 463  | norM | multidrug resistance protein, MATE family                                           |
| FaGL0448 | 263  | -    | oleoyl-[acyl-carrier-protein] hydrolase                                             |
| FaGL0449 | 434  | tlyC | putative hemolysin                                                                  |

---

---

|          |     |      |                                                                                          |
|----------|-----|------|------------------------------------------------------------------------------------------|
| FaGL0452 | 100 | -    | 7,8-dihydropterin-6-yl-methyl-4-(beta-D-ribofuranosyl)aminobenzene 5'-phosphate synthase |
| FaGL0453 | 430 | msrC | peptide methionine sulfoxide reductase                                                   |
| FaGL0455 | 504 | pepA | leucyl aminopeptidase                                                                    |
| FaGL0456 | 216 | -    | carboxylase                                                                              |
| FaGL0457 | 312 | -    | allophanate hydrolase                                                                    |
| FaGL0460 | 220 | pcp  | pyroglutamyl-peptidase                                                                   |
| FaGL0461 | 533 | asnB | asparagine synthase (glutamine-hydrolysing)                                              |

**type I PKS/NRPS hybrid cluster 2 (FaGL4470-FaGL4515)**

**key genes**

|          |      |       |                                                                   |
|----------|------|-------|-------------------------------------------------------------------|
| FaGL4480 | 183  | rpoE  | RNA polymerase sigma-70 factor, ECF subfamily                     |
| FaGL4487 | 144  | zur   | Fur family transcriptional regulator, zinc uptake regulator       |
| FaGL4488 | 756  | cheBR | two-component system, chemotaxis family, CheB/CheR fusion protein |
| FaGL4489 | 586  | ggt   | gamma-glutamyltranspeptidase                                      |
| FaGL4491 | 3326 | -     | amino acid adenylation domain-containing protein                  |
| FaGL4492 | 3275 | lgrD  | linear gramicidin synthetase subunit D                            |
| FaGL4493 | 4022 | lgrD  | linear gramicidin synthetase subunit D                            |
| FaGL4495 | 448  | -     | D-alanyl-D-alanine carboxypeptidase                               |
| FaGL4498 | 527  | pvdE  | putative ATP-binding cassette transporter                         |
| FaGL4505 | 448  | accC  | acetyl-CoA carboxylase, biotin carboxylase subunit                |
| FaGL4506 | 154  | accB  | acetyl-CoA carboxylase biotin carboxyl carrier protein            |
| FaGL4515 | 382  | argE  | acetylornithine deacetylase                                       |

**type I PKS/NRPS hybrid cluster 3 (FaGL1419-FaGL1460)**

**key genes**

|          |      |      |                                                                                |
|----------|------|------|--------------------------------------------------------------------------------|
| FaGL1419 | 3426 | lgrD | linear gramicidin synthetase subunit D                                         |
| FaGL1420 | 3206 | lgrD | linear gramicidin synthetase subunit D                                         |
| FaGL1421 | 573  | pvdE | putative ATP-binding cassette transporter                                      |
| FaGL1423 | 447  | -    | HlyD family secretion protein                                                  |
| FaGL1424 | 237  | -    | putative ABC transport system ATP-binding protein                              |
| FaGL1427 | 460  | -    | two-component system, NtrC family, response regulator                          |
| FaGL1428 | 396  | ntrY | two-component system, NtrC family, nitrogen regulation sensor histidine kinase |
| FaGL1433 | 434  | pvdA | L-ornithine N5-oxygenase                                                       |
| FaGL1434 | 732  | -    | iron complex outer membrane receptor protein                                   |
| FaGL1435 | 2477 | -    | aspartate racemase                                                             |
| FaGL1436 | 1127 | -    | aspartate racemase                                                             |
| FaGL1437 | 1512 | -    | glutamate-1-semialdehyde 2,1-aminomutase                                       |

---

---

|          |      |       |                                                |
|----------|------|-------|------------------------------------------------|
| FaGL1438 | 1818 | paeJ  | polyketide synthase                            |
| FaGL1439 | 246  | -     | oleoyl-[acyl-carrier-protein] hydrolase        |
| FaGL1441 | 538  | pvdE  | pyoverdine synthetase E                        |
| FaGL1442 | 372  | dapE  | succinyl-diaminopimelate desuccinylase         |
| FaGL1444 | 210  | iucB  | acetyl CoA:N6-hydroxylysine acetyl transferase |
| FaGL1445 | 314  | yeaP  | diguanylate cyclase                            |
| FaGL1453 | 306  | dgcB  | diguanylate cyclase                            |
| FaGL1454 | 379  | proB/ | glutamate 5-kinase                             |

**type I PKS/NRPS hybrid cluster 4 (FaGL2543-FaGL2561)**

**key genes**

|          |      |      |                                                                                |
|----------|------|------|--------------------------------------------------------------------------------|
| FaGL2544 | 592  | -    | ATP-binding cassette, subfamily C                                              |
| FaGL2548 | 411  | sufS | cysteine desulfurase / selenocysteine lyase                                    |
| FaGL2550 | 465  | glnG | two-component system, NtrC family, nitrogen regulation response regulator      |
| FaGL2551 | 360  | glnL | two-component system, NtrC family, nitrogen regulation sensor histidine kinase |
| FaGL2555 | 576  | pvdE | putative ATP-binding cassette transporter                                      |
| FaGL2556 | 1045 | dhbF | nonribosomal peptide synthetase                                                |
| FaGL2557 | 1801 | ppsE | phenolphthiocerol synthesis type-I polyketide synthase E                       |
| FaGL2558 | 1097 | -    | amino acid adenylation domain-containing protein                               |
| FaGL2559 | 1136 | dhbF | nonribosomal peptide synthetase                                                |
| FaGL2560 | 256  | ectD | ectoine hydroxylase                                                            |
| FaGL2561 | 2207 | -    | amino acid adenylation                                                         |

**NRPS gene cluster 1 (FaGL3492-FaGL3512)**

**key genes**

|          |      |      |                                                      |
|----------|------|------|------------------------------------------------------|
| FaGL3492 | 1517 | -    | photinus-luciferin 4-monooxygenase (ATP-hydrolysing) |
| FaGL3493 | 251  | -    | oleoyl-[acyl-carrier-protein] hydrolase              |
| FaGL3495 | 243  | fabG | 3-oxoacyl-[acyl-carrier protein] reductase           |
| FaGL3496 | 132  | fabZ | 3-hydroxyacyl-[acyl-carrier-protein] dehydratase     |
| FaGL3497 | 371  | -    | ABC-2 type transport system permease protein         |
| FaGL3498 | 207  | -    | ABC-2 type transport system ATP-binding protein      |
| FaGL3499 | 727  | fabF | 3-oxoacyl-[acyl-carrier-protein] synthase II         |
| FaGL3500 | 498  | -    | 4-coumarate--CoA ligase                              |
| FaGL3501 | 112  | acpP | acyl carrier protein                                 |
| FaGL3502 | 539  | hutH | histidine ammonia-lyase                              |
| FaGL3504 | 197  | yvfR | ABC-2 type transport system ATP-binding protein      |
| FaGL3506 | 662  | toxR | cholera toxin transcriptional activator              |
| FaGL3508 | 817  | fadE | acyl-CoA dehydrogenase                               |

---

---

|          |     |      |                                       |
|----------|-----|------|---------------------------------------|
| FaGL3510 | 374 | pdxB | erythronate-4-phosphate dehydrogenase |
| FaGL3511 | 338 | asd  | aspartate-semialdehyde dehydrogenase  |

**NRPS gene cluster 2 (FaGL4138-FaGL4183)**

**key genes**

|          |      |        |                                                                      |
|----------|------|--------|----------------------------------------------------------------------|
| FaGL4154 | 279  | rexA   | oligosaccharide reducing-end xylanase                                |
| FaGL4155 | 850  | -      | serine/threonine protein kinase                                      |
| FaGL4161 | 297  | ydhF   | oxidoreductase                                                       |
| FaGL4162 | 405  | purT   | phosphoribosylglycinamide formyltransferase 2                        |
| FaGL4163 | 1660 | dhbF   | nonribosomal peptide synthetase                                      |
| FaGL4164 | 2103 | -      | nonribosomal peptide synthetase                                      |
| FaGL4165 | 1370 | -      | photinus-luciferin 4-monooxygenase (ATP-hydrolysing)                 |
| FaGL4169 | 318  | natA_1 | ABC-2 type transport system ATP-binding protein                      |
| FaGL4171 | 293  | -      | ABC transporter ATP-binding protein                                  |
| FaGL4172 | 225  | -      | nitroreductase                                                       |
| FaGL4173 | 348  | mdtA   | putative multidrug efflux transporter                                |
| FaGL4174 | 1077 | -      | hydrophobic/amphiphilic exporter-1 (mainly G- bacteria), HAE1 family |
| FaGL4175 | 101  | arsR   | ArsR family transcriptional regulator                                |
| FaGL4176 | 114  | gloB   | hydroxyacylglutathione hydrolase                                     |
| FaGL4179 | 252  | -      | putative PAS/PAC sensor protein                                      |
| FaGL4182 | 409  | mscS   | small conductance mechanosensitive channel                           |
| FaGL4183 | 306  | -      | acyltransferase                                                      |

**NRPS gene cluster 3 (FaGL1775-FaGL1792)**

**key genes**

|          |      |      |                                                             |
|----------|------|------|-------------------------------------------------------------|
| FaGL1775 | 2241 | mps1 | glycopeptidolipid biosynthesis protein                      |
| FaGL1776 | 412  | -    | dehydrogenase                                               |
| FaGL1779 | 411  | mdtH | MFS transporter, DHA1 family, multidrug resistance protein  |
| FaGL1780 | 171  | pagL | lipid A 3-O-deacylase                                       |
| FaGL1781 | 248  | -    | polar amino acid transport system substrate-binding protein |
| FaGL1782 | 794  | ygjK | putative isomerase                                          |
| FaGL1783 | 400  | adh  | alcohol dehydrogenase                                       |
| FaGL1784 | 156  | rpoE | RNA polymerase sigma-70 factor, ECF subfamily               |
| FaGL1785 | 321  | fecR | transmembrane sensor                                        |
| FaGL1786 | 909  | tbpA | hemoglobin/transferrin/lactoferrin receptor protein         |
| FaGL1787 | 211  | hemO | heme oxygenase                                              |
| FaGL1789 | 674  | mcp  | methyl-accepting chemotaxis protein                         |
| FaGL1792 | 324  | -    | AraC family transcriptional regulator                       |

---
